# Supplementary material for: Genetic association analysis of the RTK/ERK pathway with aggressive prostate cancer highlights the potential role of CCND2 in disease progression
Source: PubMed Central journal article supplement (PMC5495790; doi:10.1038/s41598-017-04731-4), 2017-07-03
Supplement: 41598_2017_4731_MOESM1_ESM.pdf [file 41598_2017_4731_MOESM1_ESM.pdf]

## Supplementary Information

### Genetic association analysis of the RTK/ERK pathway with aggressive prostate cancer highlights the potential role of *CCND2* in disease progression

Yang Chen<sup>1,2,3\*</sup>, Qin Zhang<sup>4,5\*</sup>, Qiuyan Wang<sup>1,3\*</sup>, Jie Li<sup>1,6\*</sup>, Csilla Sipeky<sup>7</sup>, Jihan Xia<sup>4,5</sup>, Ping Gao<sup>4,5</sup>, Yanling Hu<sup>1,3,8</sup>, Haiying Zhang<sup>1,3</sup>, Xiaobo Yang<sup>1,3</sup>, Haitao Chen<sup>9</sup>, Yonghua Jiang<sup>1,3</sup>, Yuehong Yang<sup>4,5</sup>, Ziting Yao<sup>1,3</sup>, Yinchun Chen<sup>1,3</sup>, Yong Gao<sup>1, 3</sup>, Aihua Tan<sup>1,3</sup>, Ming Liao<sup>1,3</sup>, Johanna Schleutker<sup>7,10</sup>, Jianfeng Xu<sup>1,3,9,11</sup>, Yinghao Sun<sup>12</sup>, Gong-Hong Wei<sup>4,5†</sup> & Zengnan Mo<sup>1,2,3†</sup>

\*These authors contributed equally to this work.

†Correspondence and requests for materials should be addressed to Z.M. (email: [zengnanmo@hotmail.com](mailto:zengnanmo@hotmail.com)) or G.-H.W. (email: [gonghong.wei@oulu.fi](mailto:gonghong.wei@oulu.fi))

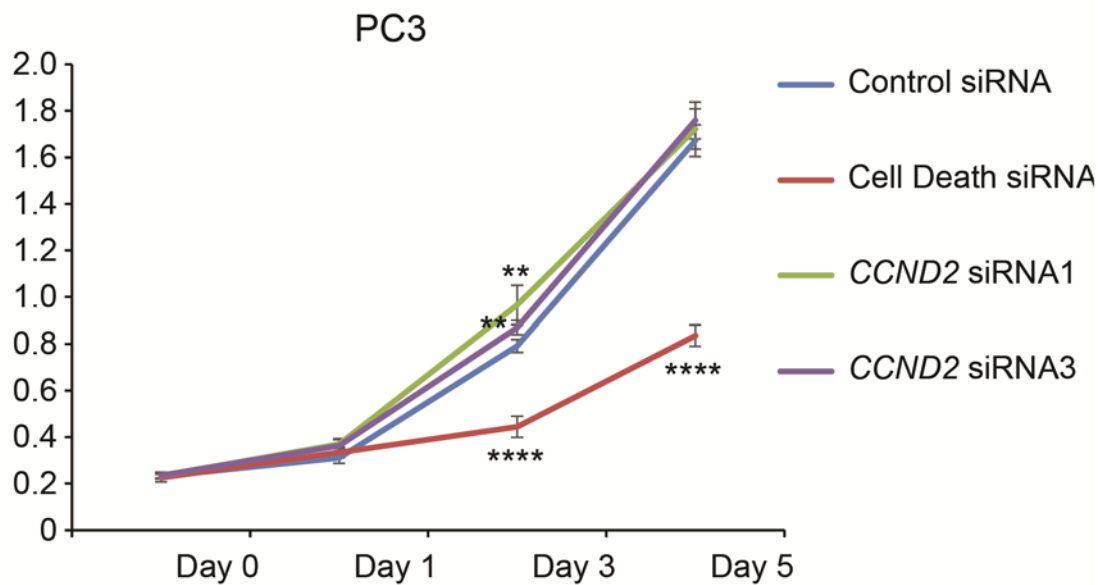

**Supplementary Figure 1. The role of *CCND2* in prostate cancer cell growth.** Knockdown of *CCND2* in PC3 slightly promotes its cellular proliferation. The two most efficient siRNAs against *CCND2* (see Figure 2b, left) were selected for cell proliferation assays in PC3 cells to evaluate the role of *CCND2* in prostate cancer cell growth. A slight increase in cell proliferation of prostate cancer PC3 cell line upon knockdown of *CCND2* was measured by XTT colorimetric assay (absorbance at 450nm (OD450); mean  $\pm$  s.d. of three independent experiments. \*\* $P < 0.01$ , \*\*\*\* $P < 0.0001$ . The  $P$  values were examined by the two-tailed Student's  $t$  test.

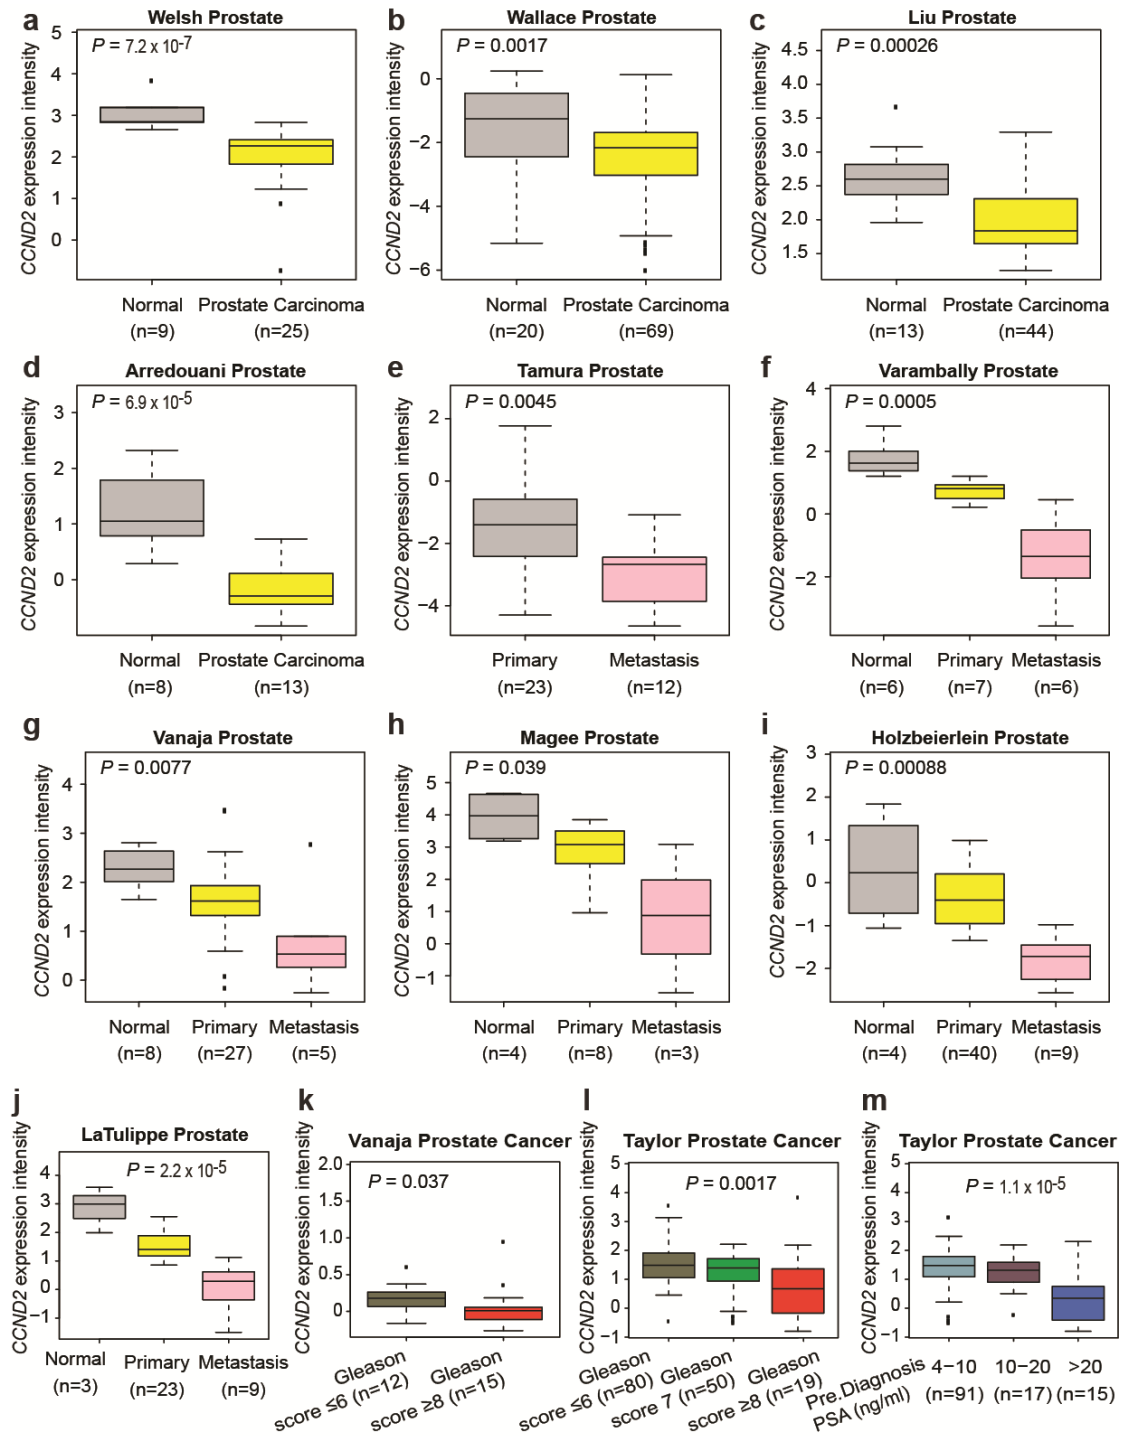

**Supplementary Figure 2. CCND2 downregulation in human prostate cancer correlates with tumor progression to advanced stages. (a-j) CCND2 expression levels are strikingly downregulated in primary and metastatic prostate tumor tissues in ten independent clinical data sets<sup>38-47</sup>. Normal, benign prostate gland. Primary, primary human prostate cancer. Metastasis, metastatic prostate samples. (k,l) CCND2 downregulation**

correlates with prostate tumor progression to high Gleason score in two independent cohorts of prostate cancer patients<sup>30,40</sup>. (m) *CCND2* underexpression markedly correlates with elevated serum PSA levels in the Taylor et al. clinical data set<sup>30</sup>. PSA is a diagnostic marker for prostate cancer. Pre.Diagnosis PSA: PSA level at diagnosis. In **a-m**, *CCND2* expression intensity is log2 median-centered intensity as described in OncoPrint database<sup>26</sup>.

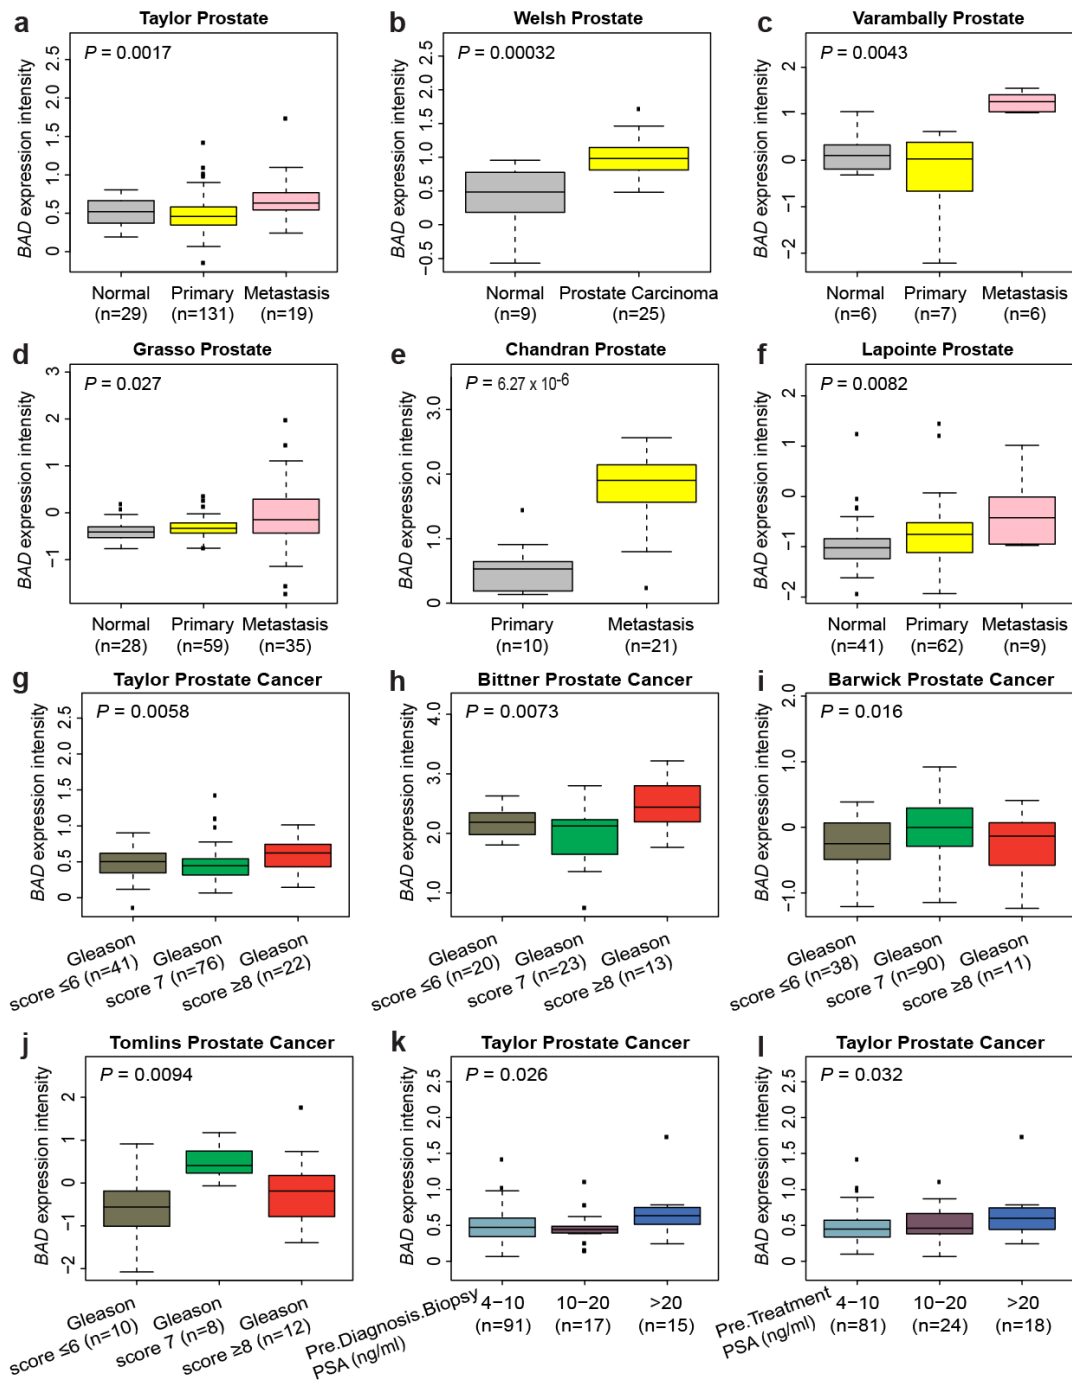

**Supplementary Figure 3. *BAD* upregulation in human prostate cancer correlates with disease progression and aggressiveness.** (a-f) *BAD* transcript levels are strikingly upregulated in primary and metastatic human prostate tumor tissues in several clinical data sets<sup>30,34,35,37-39</sup>. Normal, benign prostate gland. Primary, primary human prostate cancer. Metastasis, metastatic prostate samples. (g-j) Increased *BAD* expression correlates with prostate tumor progression to high Gleason score in multiple cohorts of patients with prostate cancer<sup>30,50,51</sup>. (k,l) *BAD* upregulation highly correlates with elevated serum PSA levels in the Taylor et al. clinical data set<sup>30</sup>. Pre.Diagnosis PSA indicates the PSA level at diagnosis. Pre.Treatment PSA refers to the PSA level prior to radical prostatectomy. In a-l, *BAD* expression intensity is log2 median-centered intensity as presented in OncoPrint database<sup>26</sup>.

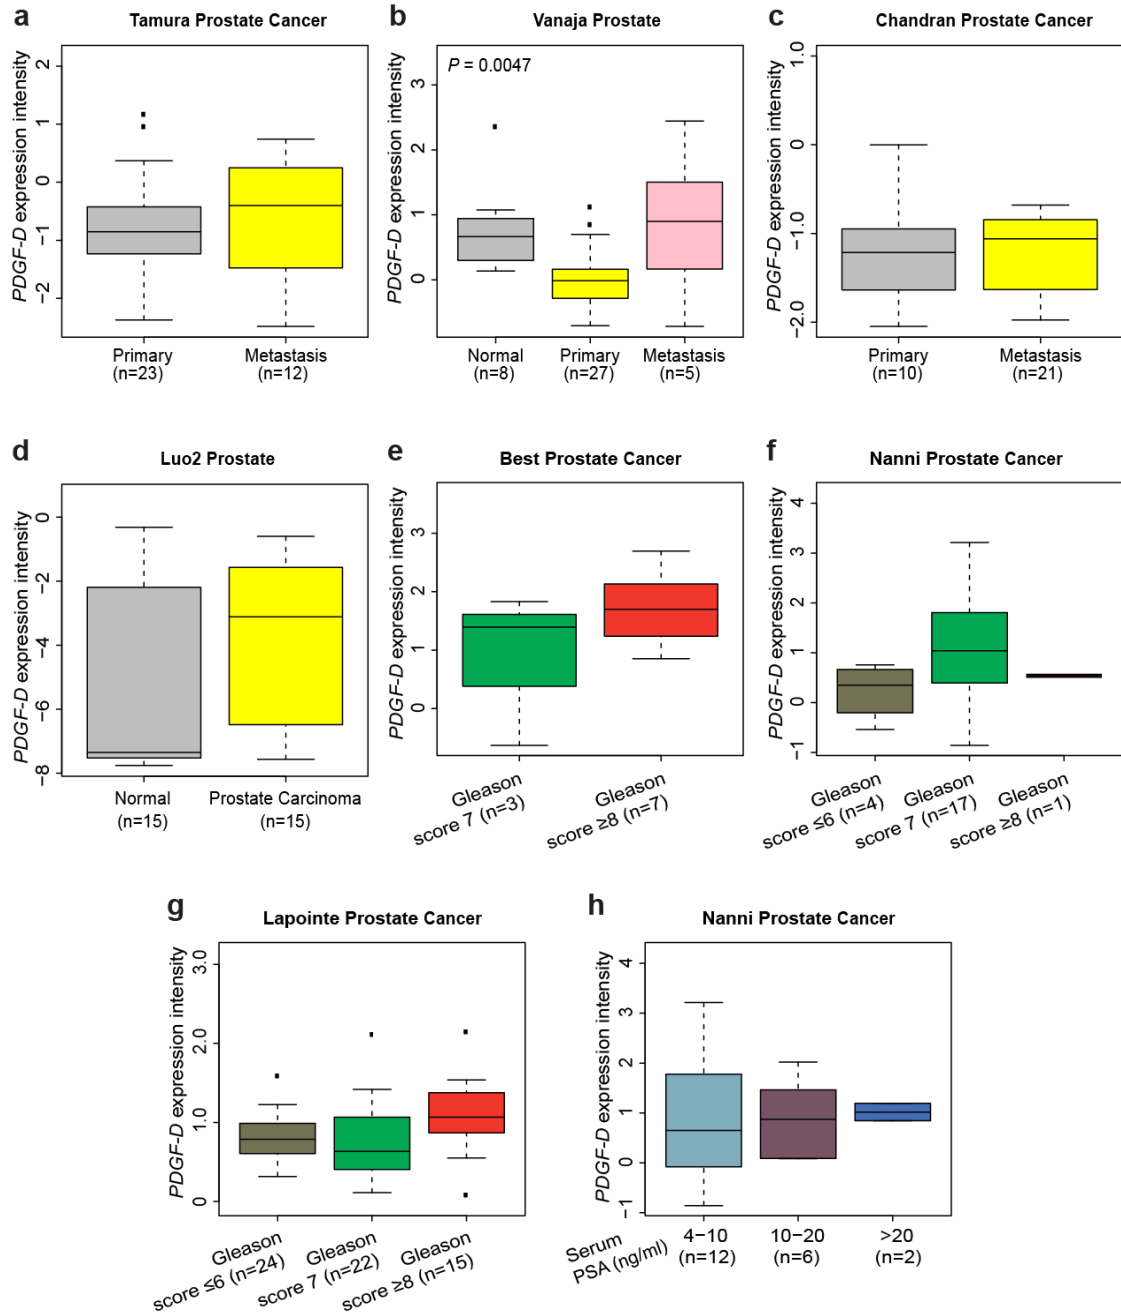

**Supplementary Figure 4. Higher expression levels of *PDGF-D* show strong tendency in the correlation with human prostate cancer progression and aggressiveness. (a-d) *PDGF-D* is highly expressed in primary and metastatic human prostate tumor tissues compared with normal prostate gland<sup>34,40,44,48</sup>. Normal, benign prostate gland. Primary, primary human prostate cancer. Metastasis, metastatic prostate samples. (e-h) Higher mRNA levels of *BAD* correlates with prostate tumor progression to high Gleason score in several cohorts of prostate cancer patients<sup>35,49,52</sup>, and elevated serum PSA levels in the Nanni prostate cancer data set<sup>43</sup>. In a-h, *BAD* expression intensity is log2 median-centered intensity as previously reported<sup>26</sup>.**

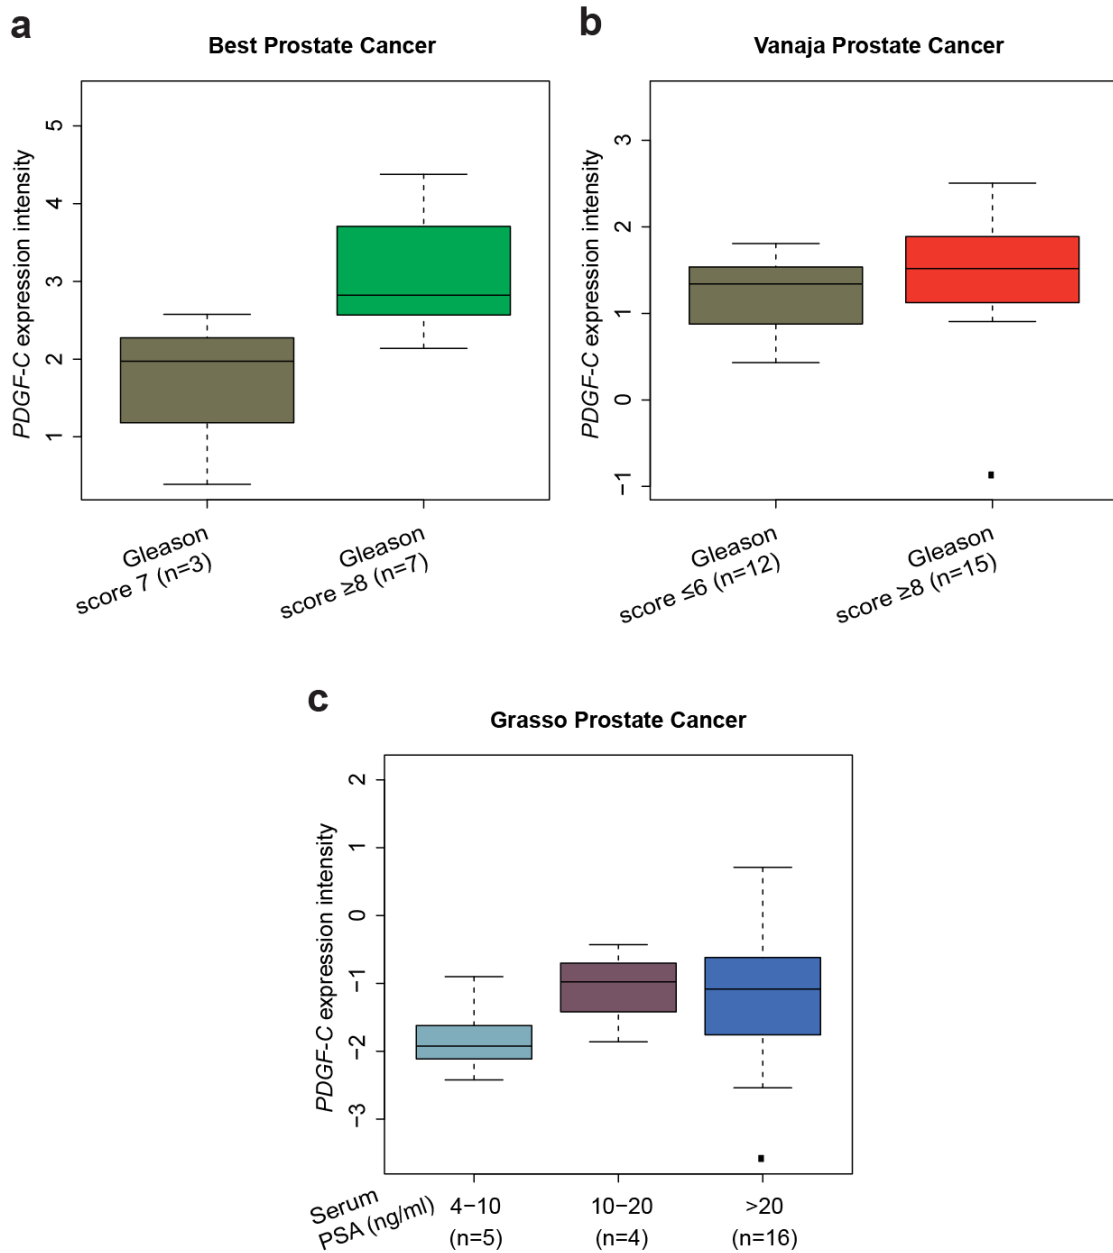

**Supplementary Figure 5. *PDGF-C* expression levels are higher in human prostate cancer samples with elevated Gleason score (a,b) and serum PSA levels (c) in several independent data sets<sup>37,40,49</sup>. *PDGF-C* expression intensity shown as log2 median-centered intensity as previously described<sup>26</sup>.**

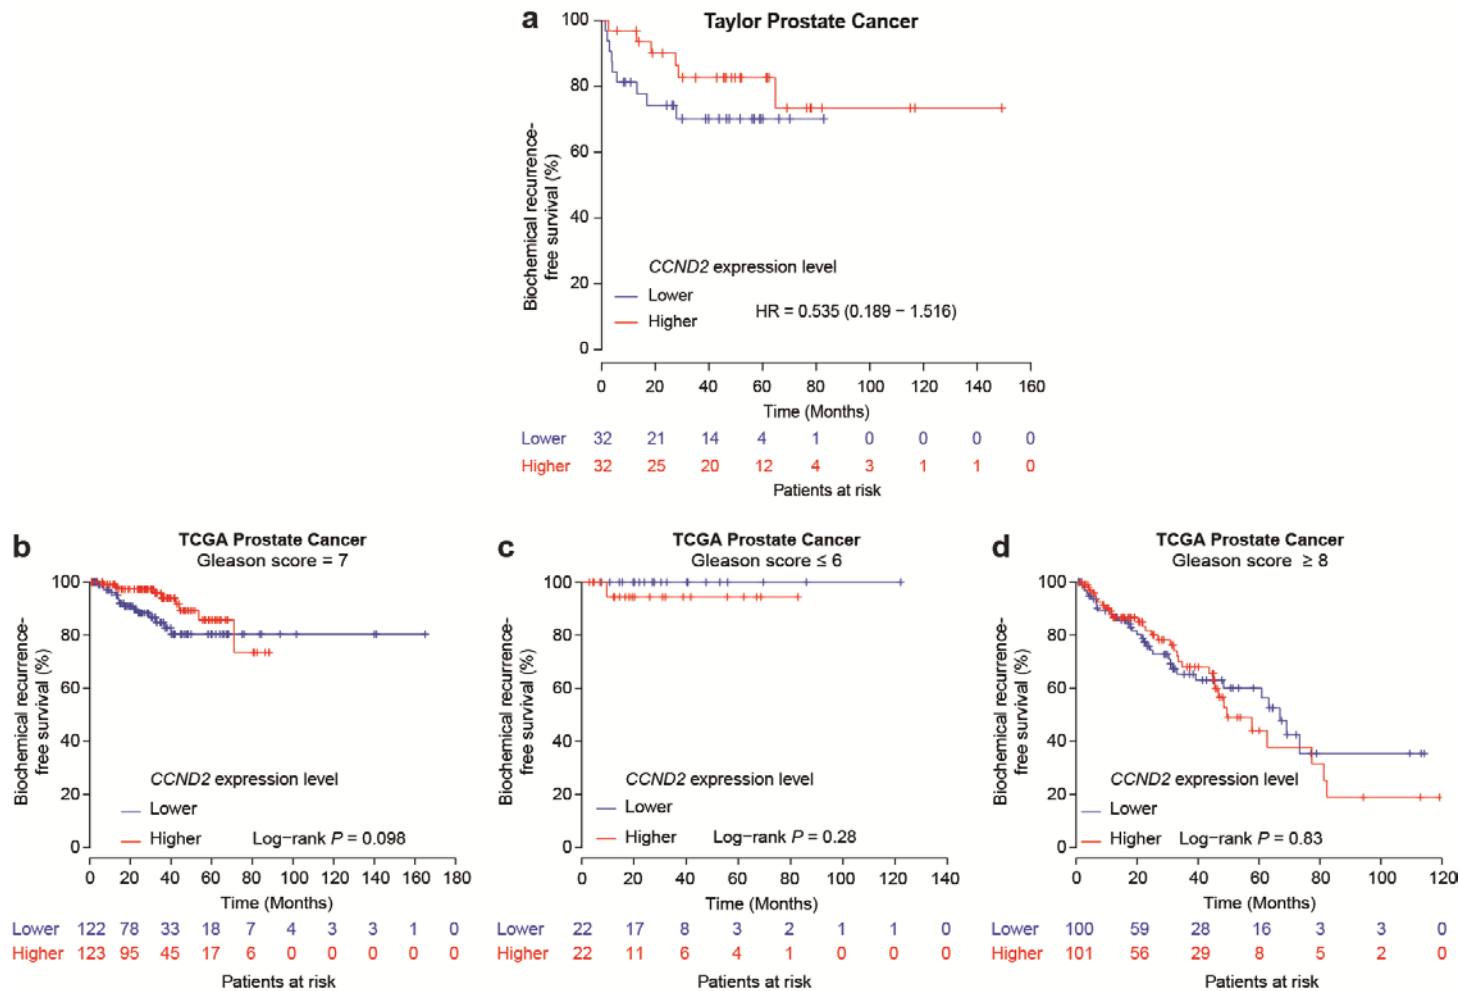

**Supplementary Figure 6. *CCND2* downregulation correlates with increased risk of biochemical recurrence in a cohort of prostate cancer patients<sup>30</sup> (a) and a subgroup of cases with Gleason score of 7<sup>55</sup> (b), but in the subgroups of Gleason score ≤ 6 (c) or ≥ 8 (d). The number of patients at risk in each group at every 20-month interval was indicated. *P* value assessed by a Log-rank test.**



| CHR | Gene | SNP        | BP        | A1 | Model     | OR (95% CI)         | P <sup>a</sup>          | Conditional<br>SNP  | Conditional<br>P value <sup>b</sup> | P <sup>e</sup>         |
|-----|------|------------|-----------|----|-----------|---------------------|-------------------------|---------------------|-------------------------------------|------------------------|
| 3   | RAF1 | rs11923427 | 12663835  | G  | Additive  | 0.551 (0.311-0.977) | 4.145×10 <sup>-2</sup>  | No_REF <sup>d</sup> | No_REF                              | 3.785×10 <sup>-2</sup> |
|     |      |            |           |    | Dominant  | 0.531 (0.289-0.977) | 4.198×10 <sup>-2</sup>  | No_REF <sup>d</sup> | No_REF                              |                        |
|     |      |            |           |    | Recessive | 0.378 (0.024-6.059) | 4.917×10 <sup>-1</sup>  | -                   | -                                   |                        |
| 4   | KDR  | rs6828477  | 55966801  | C  | Additive  | 0.762 (0.618-0.939) | 1.069×10 <sup>-2</sup>  | REF <sup>c</sup>    | REF                                 | 1.182×10 <sup>-2</sup> |
|     |      |            |           |    | Dominant  | 0.758 (0.591-0.973) | 2.968×10 <sup>-2</sup>  | rs12643184          | 6.093×10 <sup>-2</sup>              |                        |
|     |      |            |           |    | Recessive | 0.564 (0.323-0.987) | 4.482×10 <sup>-2</sup>  | rs2255355           | 4.013×10 <sup>-2</sup>              |                        |
|     |      | rs3816584  | 55964565  | G  | Additive  | 1.208 (1.011-1.443) | 3.772×10 <sup>-2</sup>  | rs6828477           | 2.313×10 <sup>-1</sup>              | 3.525×10 <sup>-2</sup> |
|     |      |            |           |    | Dominant  | 1.263 (0.967-1.650) | 8.635×10 <sup>-2</sup>  | -                   | -                                   |                        |
|     |      |            |           |    | Recessive | 1.313 (0.954-1.807) | 9.437×10 <sup>-2</sup>  | -                   | -                                   |                        |
|     |      | rs1531289  | 55955232  | T  | Additive  | 0.836 (0.670-1.043) | 1.1280×10 <sup>-1</sup> | -                   | -                                   | 1.233×10 <sup>-1</sup> |
|     |      |            |           |    | Dominant  | 0.872 (0.676-1.126) | 2.939×10 <sup>-1</sup>  | -                   | -                                   |                        |
|     |      |            |           |    | Recessive | 0.499 (0.260-0.958) | 3.661×10 <sup>-2</sup>  | rs2255355           | 2.540×10 <sup>-2</sup>              |                        |
| 4   | EGF  | rs6818260  | 110887254 | C  | Additive  | 0.758 (0.599-0.960) | 2.126×10 <sup>-2</sup>  | rs6828477           | 2.129×10 <sup>-2</sup>              | 2.615×10 <sup>-2</sup> |
|     |      |            |           |    | Dominant  | 0.760 (0.583-0.991) | 4.266×10 <sup>-2</sup>  | rs12643184          | 6.997×10 <sup>-2</sup>              |                        |
|     |      |            |           |    | Recessive | 0.509 (0.234-1.110) | 8.958×10 <sup>-2</sup>  | -                   | -                                   |                        |

|   |        |            |           |   |           |                     |                        |                  |                        |                        |
|---|--------|------------|-----------|---|-----------|---------------------|------------------------|------------------|------------------------|------------------------|
|   |        | rs7677295  | 110856192 | T | Additive  | 0.768 (0.605-0.974) | $2.935 \times 10^{-2}$ | rs6828477        | $3.091 \times 10^{-2}$ | $3.551 \times 10^{-2}$ |
|   |        |            |           |   | Dominant  | 0.778 (0.596-1.016) | $6.531 \times 10^{-2}$ | -                | -                      |                        |
|   |        |            |           |   | Recessive | 0.476 (0.216-1.049) | $6.551 \times 10^{-2}$ | -                | --                     |                        |
|   |        | rs881878   | 110836048 | A | Additive  | 1.612 (1.043-2.491) | $3.154 \times 10^{-2}$ | rs6828477        | $3.991 \times 10^{-2}$ | $3.592 \times 10^{-2}$ |
|   |        |            |           |   | Dominant  | 1.583 (1.011-2.480) | $4.475 \times 10^{-2}$ | rs12643184       | $5.571 \times 10^{-2}$ |                        |
|   |        |            |           |   | Recessive | NA                  | $9.985 \times 10^{-1}$ | -                | -                      |                        |
|   |        | rs6533485  | 110927563 | G | Additive  | 1.229 (1.002-1.509) | $4.800 \times 10^{-2}$ | rs6828477        | $4.261 \times 10^{-2}$ | $4.644 \times 10^{-2}$ |
|   |        |            |           |   | Dominant  | 1.230 (0.951-1.591) | $1.146 \times 10^{-1}$ | -                | -                      |                        |
|   |        |            |           |   | Recessive | 1.588 (0.945-2.669) | $8.062 \times 10^{-2}$ | -                | -                      |                        |
| 4 | PDGF-C | rs17035367 | 157786225 | G | Additive  | 0.708 (0.517-0.969) | $3.103 \times 10^{-2}$ | rs6828477        | $3.164 \times 10^{-2}$ | $2.418 \times 10^{-2}$ |
|   |        |            |           |   | Dominant  | 0.681 (0.488-0.950) | $2.375 \times 10^{-2}$ | rs12643184       | $4.682 \times 10^{-2}$ |                        |
|   |        |            |           |   | Recessive | 0.915 (0.177-4.739) | $9.154 \times 10^{-1}$ | -                | -                      |                        |
|   |        | rs12643184 | 157848474 | T | Additive  | 1.374 (1.021-1.848) | $3.612 \times 10^{-2}$ | rs6828477        | $3.464 \times 10^{-2}$ | $3.566 \times 10^{-2}$ |
|   |        |            |           |   | Dominant  | 1.484 (1.062-2.075) | $2.094 \times 10^{-2}$ | REF <sup>c</sup> | REF                    |                        |
|   |        |            |           |   | Recessive | 1.130 (0.444-2.877) | $7.985 \times 10^{-1}$ | -                | -                      |                        |
|   |        | rs6822796  | 157887357 | T | Additive  | 1.227 (1.005-1.497) | $4.459 \times 10^{-2}$ | rs6828477        | $4.359 \times 10^{-2}$ | $4.243 \times 10^{-2}$ |
|   |        |            |           |   | Dominant  | 1.226 (0.954-1.576) | $1.116 \times 10^{-1}$ | -                | -                      |                        |

|   |        |            |           |   |           |                     |                        |                     |                        |                        |
|---|--------|------------|-----------|---|-----------|---------------------|------------------------|---------------------|------------------------|------------------------|
|   |        |            |           |   | Recessive | 1.534 (0.946-2.490) | $8.307 \times 10^{-2}$ | -                   | -                      |                        |
| 5 | PDGFRB | rs4705415  | 149517235 | A | Additive  | 0.819 (0.680-0.987) | $3.537 \times 10^{-2}$ | No_REF <sup>d</sup> | No_REF                 | $3.636 \times 10^{-2}$ |
|   |        |            |           |   | Dominant  | 0.725 (0.555-0.946) | $1.791 \times 10^{-2}$ | REF <sup>c</sup>    | REF                    |                        |
|   |        |            |           |   | Recessive | 0.865 (0.604-1.240) | $4.305 \times 10^{-1}$ | -                   | -                      |                        |
|   |        | rs17708574 | 149521238 | A | Additive  | 0.822 (0.665-1.016) | $6.967 \times 10^{-2}$ | -                   | -                      |                        |
|   |        |            |           |   | Dominant  | 0.745 (0.579-0.959) | $2.204 \times 10^{-2}$ | rs4705415           | $1.997 \times 10^{-1}$ | $7.044 \times 10^{-2}$ |
|   |        |            |           |   | Recessive | 1.126 (0.594-2.131) | $7.166 \times 10^{-1}$ | -                   | -                      |                        |
|   |        | rs740750   | 149515074 | A | Additive  | 0.843 (0.704-1.010) | $6.420 \times 10^{-2}$ | -                   | -                      | $6.747 \times 10^{-2}$ |
|   |        |            |           |   | Dominant  | 0.737 (0.567-0.959) | $2.310 \times 10^{-2}$ | rs4705415           | $8.881 \times 10^{-1}$ |                        |
|   |        |            |           |   | Recessive | 0.922 (0.653-1.301) | $6.434 \times 10^{-1}$ | -                   | -                      |                        |
| 6 | FYN    | rs9487729  | 112151975 | A | Additive  | 0.789 (0.652-0.954) | $1.456 \times 10^{-2}$ | No_REF <sup>d</sup> | No_REF                 | $1.557 \times 10^{-2}$ |
|   |        |            |           |   | Dominant  | 0.772 (0.594-1.001) | $5.128 \times 10^{-2}$ | -                   | -                      |                        |
|   |        |            |           |   | Recessive | 0.655 (0.443-0.966) | $3.303 \times 10^{-2}$ | No_REF <sup>d</sup> | No_REF                 |                        |
| 7 | EGFR   | rs6593210  | 55254186  | A | Additive  | 0.681 (0.484-0.958) | $2.727 \times 10^{-2}$ | rs1050171           | $6.038 \times 10^{-1}$ | $2.516 \times 10^{-2}$ |
|   |        |            |           |   | Dominant  | 0.669 (0.471-0.951) | $2.497 \times 10^{-2}$ | rs1050171           | $6.315 \times 10^{-1}$ |                        |
|   |        |            |           |   | Recessive | 0.764 (0.069-8.463) | $8.263 \times 10^{-1}$ | -                   | -                      |                        |
|   |        | rs2740761  | 55255986  | T | Additive  | 0.682 (0.485-0.960) | $2.807 \times 10^{-2}$ | rs1050171           | $6.023 \times 10^{-1}$ | $2.597 \times 10^{-2}$ |

|    |        |            |           |           |                     |                        |                        |                        |                        |                        |
|----|--------|------------|-----------|-----------|---------------------|------------------------|------------------------|------------------------|------------------------|------------------------|
|    |        |            |           | Dominant  | 0.670 (0.472-0.953) | $2.574 \times 10^{-2}$ | rs1050171              | $6.300 \times 10^{-1}$ |                        |                        |
|    |        |            |           | Recessive | 0.763 (0.069-8.454) | $8.256 \times 10^{-1}$ | -                      | -                      |                        |                        |
|    |        | rs845561   | 55252708  | T         | Additive            | 0.803 (0.647-0.999)    | $4.841 \times 10^{-2}$ | rs1050171              | $6.417 \times 10^{-1}$ | $5.412 \times 10^{-2}$ |
|    |        |            |           | Dominant  | 0.802 (0.621-1.036) | $9.062 \times 10^{-2}$ | -                      | -                      |                        |                        |
|    |        |            |           | Recessive | 0.620 (0.337-1.140) | $1.242 \times 10^{-1}$ | -                      | -                      |                        |                        |
|    |        | rs2041647  | 55183115  | A         | Additive            | 1.123 (0.926-1.362)    | $2.400 \times 10^{-1}$ | -                      | -                      | $2.346 \times 10^{-1}$ |
|    |        |            |           | Dominant  | 1.031 (0.802-1.324) | $8.128 \times 10^{-1}$ | -                      | -                      |                        |                        |
|    |        |            |           | Recessive | 1.678 (1.048-2.687) | $3.101 \times 10^{-2}$ | rs714180               | $3.101 \times 10^{-2}$ |                        |                        |
| 7  | MET    | rs714180   | 116319002 | A         | Additive            | 1.121 (0.944-1.330)    | $1.923 \times 10^{-1}$ | -                      | -                      | $1.676 \times 10^{-1}$ |
|    |        |            |           | Dominant  | 0.988 (0.761-1.282) | $9.276 \times 10^{-1}$ | -                      | -                      |                        |                        |
|    |        |            |           | Recessive | 1.500 (1.082-2.079) | $1.488 \times 10^{-2}$ | REF <sup>c</sup>       | REF                    |                        |                        |
| 11 | PDGF-D | rs11226159 | 103978540 | G         | Additive            | 1.332 (1.044-1.700)    | $2.112 \times 10^{-2}$ | rs603781               | $2.274 \times 10^{-1}$ | $2.462 \times 10^{-2}$ |
|    |        |            |           | Dominant  | 1.387 (1.051-1.830) | $2.088 \times 10^{-2}$ | rs603781               | $1.999 \times 10^{-1}$ |                        |                        |
|    |        |            |           | Recessive | 1.474 (0.672-3.233) | $3.332 \times 10^{-1}$ | -                      | -                      |                        |                        |
|    |        | rs488753   | 103976293 | C         | Additive            | 1.290 (1.024-1.626)    | $3.041 \times 10^{-2}$ | rs603781               | $2.979 \times 10^{-1}$ | $3.848 \times 10^{-2}$ |
|    |        |            |           | Dominant  | 1.355 (1.036-1.771) | $2.638 \times 10^{-2}$ | rs603781               | $2.365 \times 10^{-1}$ |                        |                        |
|    |        |            |           | Recessive | 1.333 (0.673-2.638) | $4.098 \times 10^{-1}$ | -                      | -                      |                        |                        |

---

|    |       |            |           |   |           |                     |                        |                     |                        |                        |
|----|-------|------------|-----------|---|-----------|---------------------|------------------------|---------------------|------------------------|------------------------|
|    |       | rs361283   | 103960620 | T | Additive  | 1.271 (1.020-1.584) | $3.271 \times 10^{-2}$ | rs603781            | $4.615 \times 10^{-1}$ | $4.008 \times 10^{-2}$ |
|    |       |            |           |   | Dominant  | 1.265 (0.979-1.635) | $7.223 \times 10^{-2}$ | -                   | -                      |                        |
|    |       |            |           |   | Recessive | 1.837 (0.919-3.670) | $8.517 \times 10^{-2}$ | -                   | -                      |                        |
|    |       | rs10895578 | 104000193 | A | Additive  | 1.297 (1.013-1.661) | $3.888 \times 10^{-2}$ | rs603781            | $3.259 \times 10^{-1}$ | $4.412 \times 10^{-2}$ |
|    |       |            |           |   | Dominant  | 1.334 (1.010-1.762) | $4.220 \times 10^{-2}$ | rs603781            | $2.995 \times 10^{-1}$ |                        |
|    |       |            |           |   | Recessive | 1.492 (0.647-3.440) | $3.475 \times 10^{-1}$ | -                   | -                      |                        |
|    |       | rs12363710 | 103877311 | G | Additive  | 1.461 (1.000-2.133) | $4.977 \times 10^{-2}$ | rs603781            | $1.059 \times 10^{-1}$ | $5.967 \times 10^{-2}$ |
|    |       |            |           |   | Dominant  | 1.448 (0.988-2.124) | $5.784 \times 10^{-2}$ | -                   | -                      |                        |
|    |       |            |           |   | Recessive | NA                  | $9.991 \times 10^{-1}$ | -                   | -                      |                        |
|    |       | rs1032233  | 103838023 | A | Additive  | 0.790 (0.549-1.137) | $2.044 \times 10^{-1}$ | -                   | -                      | $1.934 \times 10^{-1}$ |
|    |       |            |           |   | Dominant  | 0.863 (0.578-1.289) | $4.722 \times 10^{-1}$ | -                   | -                      |                        |
|    |       |            |           |   | Recessive | 0.144 (0.028-0.747) | $2.107 \times 10^{-2}$ | No_REF <sup>d</sup> | No_REF                 |                        |
| 11 | BAD   | rs11231741 | 64046885  | T | Additive  | 0.723 (0.549-0.952) | $2.096 \times 10^{-2}$ | rs603781            | $2.738 \times 10^{-2}$ | $2.117 \times 10^{-2}$ |
|    |       |            |           |   | Dominant  | 0.669 (0.491-0.912) | $1.104 \times 10^{-2}$ | rs603781            | $1.945 \times 10^{-2}$ |                        |
|    |       |            |           |   | Recessive | 0.922 (0.326-2.607) | $8.781 \times 10^{-1}$ | -                   | -                      |                        |
| 12 | CCND2 | rs10849028 | 4405850   | G | Additive  | 1.516 (1.082-2.124) | $1.561 \times 10^{-2}$ | rs3217892           | $5.946 \times 10^{-1}$ | $1.740 \times 10^{-2}$ |
|    |       |            |           |   | Dominant  | 1.524 (1.037-2.241) | $3.208 \times 10^{-2}$ | rs3217892           | $6.626 \times 10^{-1}$ |                        |

|    |       |            |          |           |                     |                        |                        |                  |                        |                        |
|----|-------|------------|----------|-----------|---------------------|------------------------|------------------------|------------------|------------------------|------------------------|
|    |       |            |          | Recessive | 2.939 (0.867-9.963) | $8.354 \times 10^{-2}$ | -                      | -                |                        |                        |
|    |       | rs3217867  | 4399917  | G         | Additive            | 0.659 (0.467-0.931)    | $1.796 \times 10^{-2}$ | rs3217892        | $3.364 \times 10^{-2}$ | $1.602 \times 10^{-2}$ |
|    |       |            |          |           | Dominant            | 0.681 (0.478-0.970)    | $3.313 \times 10^{-2}$ | rs3217892        | $5.500 \times 10^{-2}$ |                        |
|    |       |            |          |           | Recessive           | NA                     | $9.990 \times 10^{-1}$ | -                | -                      |                        |
|    |       | rs3217916  | 4408673  | C         | Additive            | 0.833 (0.696-0.996)    | $4.514 \times 10^{-2}$ | rs3217892        | $4.767 \times 10^{-1}$ | $4.964 \times 10^{-2}$ |
|    |       |            |          |           | Dominant            | 0.781 (0.598-1.021)    | $7.053 \times 10^{-2}$ | -                | -                      |                        |
|    |       |            |          |           | Recessive           | 0.796 (0.578-1.095)    | $1.608 \times 10^{-1}$ | -                | -                      |                        |
|    |       | rs3217863  | 4399496  | T         | Additive            | 1.113 (0.922-1.345)    | $2.643 \times 10^{-1}$ | -                | -                      | $2.886 \times 10^{-1}$ |
|    |       |            |          |           | Dominant            | 1.022 (0.798-1.309)    | $8.609 \times 10^{-1}$ | -                | -                      |                        |
|    |       |            |          |           | Recessive           | 1.617 (1.034-2.531)    | $3.525 \times 10^{-2}$ | rs3217907        | $2.313 \times 10^{-1}$ |                        |
| 13 | FLT1  | rs7330109  | 29020256 | T         | Additive            | 0.824 (0.658-1.031)    | $9.004 \times 10^{-2}$ | -                | -                      | $8.595 \times 10^{-2}$ |
|    |       |            |          |           | Dominant            | 0.751 (0.578-0.976)    | $3.204 \times 10^{-2}$ | REF <sup>c</sup> | REF                    |                        |
|    |       |            |          |           | Recessive           | 1.191 (0.578-2.454)    | $6.356 \times 10^{-1}$ | -                | -                      |                        |
|    |       | rs11149523 | 28995630 | A         | Additive            | 0.828 (0.663-1.034)    | $9.554 \times 10^{-2}$ | -                | -                      | $9.484 \times 10^{-2}$ |
|    |       |            |          |           | Dominant            | 0.762 (0.589-0.986)    | $3.840 \times 10^{-2}$ | rs7330109        | $5.560 \times 10^{-1}$ |                        |
|    |       |            |          |           | Recessive           | 1.162 (0.564-2.394)    | $6.834 \times 10^{-1}$ | -                | -                      |                        |
| 15 | IGF1R | rs4966036  | 99429749 | C         | Additive            | 0.879 (0.733-1.055)    | $1.667 \times 10^{-1}$ | -                | -                      | $1.771 \times 10^{-1}$ |

|           |          |   |           |                     |                        |                  |                        |                        |
|-----------|----------|---|-----------|---------------------|------------------------|------------------|------------------------|------------------------|
|           |          |   | Dominant  | 0.746 (0.568-0.981) | $3.598 \times 10^{-2}$ | REF <sup>c</sup> | REF                    |                        |
|           |          |   | Recessive | 1.020 (0.726-1.432) | $9.093 \times 10^{-1}$ | -                | -                      |                        |
| rs2670504 | 99401590 | A | Additive  | 0.871 (0.730-1.038) | $1.231 \times 10^{-1}$ | -                | -                      | $1.343 \times 10^{-1}$ |
|           |          |   | Dominant  | 0.761 (0.580-0.997) | $4.735 \times 10^{-2}$ | rs4966036        | $7.025 \times 10^{-1}$ |                        |
|           |          |   | Recessive | 0.940 (0.686-1.288) | $7.021 \times 10^{-1}$ | -                | -                      |                        |
| rs8030777 | 99403952 | C | Additive  | 1.225 (0.982-1.529) | $7.219 \times 10^{-2}$ | -                | -                      | $7.700 \times 10^{-2}$ |
|           |          |   | Dominant  | 1.162 (0.896-1.507) | $2.582 \times 10^{-1}$ | -                | -                      |                        |
|           |          |   | Recessive | 2.437 (1.143-5.195) | $2.114 \times 10^{-2}$ | rs11247380       | $1.873 \times 10^{-1}$ |                        |
| rs1521481 | 99414423 | A | Additive  | 1.191 (0.953-1.489) | $1.253 \times 10^{-1}$ | -                | -                      | $1.342 \times 10^{-1}$ |
|           |          |   | Dominant  | 1.124 (0.864-1.462) | $3.846 \times 10^{-1}$ | -                | -                      |                        |
|           |          |   | Recessive | 2.331 (1.091-4.980) | $2.887 \times 10^{-2}$ | rs11247380       | $3.001 \times 10^{-1}$ |                        |
| rs2684811 | 99453563 | G | Additive  | 1.082 (0.902-1.300) | $3.958 \times 10^{-1}$ | -                | -                      | $4.451 \times 10^{-1}$ |
|           |          |   | Dominant  | 0.954 (0.738-1.233) | $7.179 \times 10^{-1}$ | -                | -                      |                        |
|           |          |   | Recessive | 1.511 (1.032-2.210) | $3.372 \times 10^{-2}$ | rs11247380       | $8.297 \times 10^{-1}$ |                        |
| rs7183706 | 99275189 | G | Additive  | 0.965 (0.783-1.188) | $7.342 \times 10^{-1}$ | -                | -                      | $7.487 \times 10^{-1}$ |
|           |          |   | Dominant  | 1.073 (0.830-1.387) | $5.901 \times 10^{-1}$ | -                | -                      |                        |
|           |          |   | Recessive | 0.584 (0.350-0.975) | $3.955 \times 10^{-2}$ | rs11247380       | $4.288 \times 10^{-2}$ |                        |

|            |            |           |           |                     |                        |                        |                        |                        |                        |                        |
|------------|------------|-----------|-----------|---------------------|------------------------|------------------------|------------------------|------------------------|------------------------|------------------------|
| 18         | BCL2       | rs1564483 | 60794654  | T                   | Additive               | 0.820 (0.684-0.984)    | $3.326 \times 10^{-2}$ | No_REF <sup>d</sup>    | No_REF                 | $3.061 \times 10^{-2}$ |
|            |            |           |           |                     | Dominant               | 0.779 (0.606-1.002)    | $5.222 \times 10^{-2}$ | -                      | -                      |                        |
|            |            |           |           |                     | Recessive              | 0.763 (0.529-1.102)    | $1.491 \times 10^{-1}$ | -                      | -                      |                        |
|            |            | rs9955190 | 60878883  | G                   | Additive               | 1.147 (0.932-1.413)    | $1.957 \times 10^{-1}$ | -                      | -                      | $2.218 \times 10^{-1}$ |
|            |            |           |           |                     | Dominant               | 1.338 (1.040-1.720)    | $2.326 \times 10^{-2}$ | REF <sup>c</sup>       | REF                    |                        |
|            |            |           |           |                     | Recessive              | 0.668 (0.410-1.120)    | $1.292 \times 10^{-1}$ | -                      | -                      |                        |
|            | rs2062011  | 60876114  | A         | Additive            | 1.162 (0.919-1.469)    | $2.109 \times 10^{-1}$ | -                      | -                      | $2.397 \times 10^{-1}$ |                        |
|            |            |           |           | Dominant            | 1.394 (1.043-1.861)    | $2.458 \times 10^{-2}$ | rs9955190              | $4.066 \times 10^{-1}$ |                        |                        |
|            |            |           |           | Recessive           | 0.682 (0.398-1.167)    | $1.625 \times 10^{-1}$ | -                      | -                      |                        |                        |
|            | rs12970840 | 60915873  | T         | Additive            | 1.137 (0.885-1.460)    | $3.165 \times 10^{-1}$ | -                      | -                      | $3.327 \times 10^{-1}$ |                        |
|            |            |           |           | Dominant            | 1.318 (0.994-1.747)    | $5.477 \times 10^{-2}$ | -                      | -                      |                        |                        |
|            |            |           |           | Recessive           | 0.384 (0.179-0.826)    | $1.434 \times 10^{-2}$ | rs7243091              | $6.037 \times 10^{-1}$ |                        |                        |
| rs17841946 | 60875442   | T         | Additive  | 0.861 (0.630-1.176) | $3.477 \times 10^{-1}$ | -                      | -                      | $3.761 \times 10^{-1}$ |                        |                        |
|            |            |           | Dominant  | 0.921 (0.653-1.300) | $6.393 \times 10^{-1}$ | -                      | -                      |                        |                        |                        |
|            |            |           | Recessive | 0.293 (0.089-0.968) | $4.407 \times 10^{-2}$ | rs7243091              | $3.911 \times 10^{-2}$ |                        |                        |                        |
| 22         | PDGFB      | rs5757573 | 39633622  | C                   | Additive               | 0.677 (0.494-0.929)    | $1.564 \times 10^{-2}$ | No_REF <sup>d</sup>    | No_REF                 | $1.637 \times 10^{-2}$ |
|            |            |           |           |                     | Dominant               | 0.686 (0.493-0.955)    | $2.564 \times 10^{-2}$ | No_REF <sup>d</sup>    | No_REF                 |                        |



---

|           |                     |                        |   |   |
|-----------|---------------------|------------------------|---|---|
| Recessive | 0.247 (0.041-1.485) | 1.264×10 <sup>-1</sup> | - | - |
|-----------|---------------------|------------------------|---|---|

---

**Supplement Table 1. The association between aggressive prostate cancer and the loci of the RTK/ERK pathway assessed by the additive, dominant and recessive models, respectively.**

- a. The P values are based on logistic regression analysis and adjusted for age
- b. The conditional P values are based on logistic regression analysis and adjusted for age and reference SNPs
- c. The reference SNPs were applied to be adjusted in the conditional analysis
- d. Only one SNP with the P < 0.05 was shown in additive model (for chromosome 3, 5, 6, 12, 18 and 22), dominant model (chromosome 3 and 22) and recessive model (chromosome 6 and 11)
- e. P for Cochran–Armitage trend test

| SNP             | Genotype | Gleason Score |                | Aggressive   |              | P                   | No- Aggressive |             | P               |
|-----------------|----------|---------------|----------------|--------------|--------------|---------------------|----------------|-------------|-----------------|
|                 |          | Aggressive    | No- Aggressive | T (I, II)    | T (III, IV)  |                     | T (I, II)      | T (III, IV) |                 |
| rs3217869       | GG+GA    | 7.76±1.09     | 6.38±0.69      | 61 (17.38%)  | 86 (17.48%)  | >0.050 <sup>a</sup> | 76 (21.90%)    | 0 (0.00%)   | NA <sup>a</sup> |
|                 | AA       | 7.75±1.15     | 6.23±0.91      | 274 (78.06%) | 390 (79.27%) |                     | 249 (71.76%)   | 0 (0.00%)   |                 |
|                 | NA       |               |                | 16 (4.56%)   | 16 (3.25%)   |                     | 22 (6.34%)     | 0 (0.00%)   |                 |
| Undefined Total |          |               |                | 113          |              |                     | 0              |             |                 |
| P <sup>c</sup>  |          |               |                | 956          |              |                     | 347            |             |                 |
| rs11923427      | GG+GC    | 7.78±1.31     | 6.11±0.58      | 9 (2.56%)    | 15 (3.05%)   | 0.683 <sup>a</sup>  | 18 (5.19%)     | 0 (0.00%)   | NA <sup>a</sup> |
|                 | CC       | 7.55±1.63     | 6.28±0.86      | 340 (96.87%) | 471 (95.73%) |                     | 327 (94.24%)   | 0 (0.00%)   |                 |
|                 | NA       |               |                | 2 (0.57%)    | 6 (1.22%)    |                     | 2 (0.58%)      | 0 (0.00%)   |                 |
| Undefined Total |          |               |                | 113          |              |                     | 0              |             |                 |
| P <sup>c</sup>  |          |               |                | 956          |              |                     | 347            |             |                 |
| rs6828477       | CC+CT    | 7.62±1.59     | 6.22±0.82      | 128 (36.47%) | 186 (37.80%) | 0.718 <sup>a</sup>  | 152 (43.80%)   | 0 (0.00%)   | NA <sup>a</sup> |
|                 | TT       | 7.51±1.66     | 6.31±0.88      | 223 (63.53%) | 306 (62.20%) |                     | 195 (56.20%)   | 0 (0.00%)   |                 |
|                 | NA       |               |                | 0 (0.00%)    | 0 (0.00%)    |                     | 0 (0.00%)      | 0 (0.00%)   |                 |
| Undefined Total |          |               |                | 113          |              |                     | 0              |             |                 |
| P <sup>c</sup>  |          |               |                | 956          |              |                     | 347            |             |                 |
| rs17035367      | GG+GA    | 7.52±1.53     | 6.21±0.77      | 44 (12.54%)  | 66 (13.41%)  | 0.756 <sup>a</sup>  | 63 (18.16%)    | 0 (0.00%)   | NA <sup>a</sup> |
|                 | AA       | 7.56±1.65     | 6.29±0.87      | 307 (87.46%) | 426 (86.59%) |                     | 284 (81.84%)   | 0 (0.00%)   |                 |
|                 | NA       |               |                | 0 (0.00%)    | 0 (0.00%)    |                     | 0 (0.00%)      | 0 (0.00%)   |                 |
| Undefined Total |          |               |                | 113          |              |                     | 0              |             |                 |
| P <sup>c</sup>  |          |               |                | 956          |              |                     | 347            |             |                 |
| rs12643184      | TT+TC    | 7.72±1.45     | 6.23±0.79      | 68 (19.37%)  | 108 (21.95%) | 0.370 <sup>a</sup>  | 56 (16.14%)    | 0 (0.00%)   | NA <sup>a</sup> |
|                 | CC       | 7.43±1.71     | 6.26±0.88      | 201 (57.27%) | 268 (54.47%) |                     | 220 (63.40%)   | 0 (0.00%)   |                 |
|                 | NA       |               |                | 82 (23.36%)  | 116 (23.58%) |                     | 71 (20.46%)    | 0 (0.00%)   |                 |
| Undefined Total |          |               |                | 113          |              |                     | 0              |             |                 |
| P <sup>c</sup>  |          |               |                | 956          |              |                     | 347            |             |                 |
| rs4705415       | AA+AG    | 7.50±1.67     | 6.31±0.86      | 208 (59.26%) | 282 (57.32%) | 0.716 <sup>a</sup>  | 225 (64.84%)   | 0 (0.00%)   | NA <sup>a</sup> |
|                 | GG       | 7.59±1.63     | 6.18±0.86      | 131 (37.32%) | 188 (38.21%) |                     | 106 (30.55%)   | 0 (0.00%)   |                 |
|                 | NA       |               |                | 12 (3.42%)   | 22 (4.47%)   |                     | 16 (4.61%)     | 0 (0.00%)   |                 |
| Undefined Total |          |               |                | 113          |              |                     | 0              |             |                 |
| P <sup>c</sup>  |          |               |                | 956          |              |                     | 347            |             |                 |
| rs9487729       | AA+AT    | 7.59±1.64     | 6.22±0.88      | 159 (45.30%) | 229 (46.54%) | 0.610 <sup>a</sup>  | 179 (51.59%)   | 0 (0.00%)   | NA <sup>a</sup> |
|                 | TT       | 7.49±1.69     | 6.39±0.68      | 165 (47.01%) | 219 (44.52%) |                     | 133 (38.33%)   | 0 (0.00%)   |                 |
|                 | NA       |               |                | 27 (7.69%)   | 44 (8.94%)   |                     | 35 (10.09%)    | 0 (0.00%)   |                 |
| Undefined Total |          |               |                | 113          |              |                     | 0              |             |                 |
| P <sup>c</sup>  |          |               |                | 956          |              |                     | 347            |             |                 |

|                |       |                    |                    |              |              |                    |              |           |                 |  |
|----------------|-------|--------------------|--------------------|--------------|--------------|--------------------|--------------|-----------|-----------------|--|
| P <sup>c</sup> |       | 0.342 <sup>c</sup> | 0.060 <sup>c</sup> |              |              |                    |              |           |                 |  |
| rs1050171      | AA+AG | 7.53±1.77          | 6.26±0.95          | 90 (25.64%)  | 136 (27.64%) |                    | 119 (34.29%) | 0 (0.00%) |                 |  |
|                | GG    | 7.57±1.57          | 6.27±0.80          | 255 (72.65%) | 351 (71.34%) | 0.580 <sup>a</sup> | 222 (63.98%) | 0 (0.00%) | NA <sup>a</sup> |  |
|                | NA    |                    |                    | 6 (1.71%)    | 5 (1.02%)    | 0.553 <sup>b</sup> | 6 (1.73%)    | 0 (0.00%) | NA <sup>b</sup> |  |
| Undefined      |       |                    |                    |              |              |                    |              | 0         |                 |  |
| Total          |       |                    |                    |              |              |                    |              | 347       |                 |  |
| P <sup>c</sup> |       | 0.731 <sup>c</sup> | 0.920 <sup>c</sup> |              |              |                    |              |           |                 |  |
| rs11231741     | TT+TC | 7.55±1.80          | 6.11±1.12          | 60 (17.09%)  | 69 (14.02%)  |                    | 75 (21.61%)  | 0 (0.00%) |                 |  |
|                | CC    | 7.55±1.60          | 6.32±0.76          | 291 (82.91%) | 423 (85.98%) | 0.244 <sup>a</sup> | 272 (78.39%) | 0 (0.00%) | NA <sup>a</sup> |  |
|                | NA    |                    |                    | 0 (0.00%)    | 0 (0.00%)    | 0.244 <sup>b</sup> | 0 (0.00%)    | 0 (0.00%) | NA <sup>b</sup> |  |
| Undefined      |       |                    |                    |              |              |                    |              | 0         |                 |  |
| Total          |       |                    |                    |              |              |                    |              | 347       |                 |  |
| P <sup>c</sup> |       | 0.999 <sup>c</sup> | 0.059 <sup>c</sup> |              |              |                    |              |           |                 |  |
| rs603781       | TT+TC | 7.46±1.69          | 6.29±0.88          | 182 (51.85%) | 267 (54.27%) |                    | 150 (43.23%) | 0 (0.00%) |                 |  |
|                | CC    | 7.65±1.56          | 6.26±0.83          | 169 (48.15%) | 225 (45.73%) | 0.529 <sup>a</sup> | 197 (56.77%) | 0 (0.00%) | NA <sup>a</sup> |  |
|                | NA    |                    |                    | 0 (0.00%)    | 0 (0.00%)    | 0.529 <sup>b</sup> | 0 (0.00%)    | 0 (0.00%) | NA <sup>b</sup> |  |
| Undefined      |       |                    |                    |              |              |                    |              | 0         |                 |  |
| Total          |       |                    |                    |              |              |                    |              | 347       |                 |  |
| P <sup>c</sup> |       | 0.073 <sup>c</sup> | 0.764 <sup>c</sup> |              |              |                    |              |           |                 |  |
| rs3217892      | AA+AG | 7.42±1.77          | 6.33±0.90          | 104 (29.63%) | 139 (28.25%) |                    | 73 (21.04%)  | 0 (0.00%) |                 |  |
|                | GG    | 7.60±1.55          | 6.24±0.82          | 193 (54.99%) | 274 (55.69%) | 0.749 <sup>a</sup> | 216 (62.25%) | 0 (0.00%) | NA <sup>a</sup> |  |
|                | NA    |                    |                    | 54 (15.38%)  | 79 (16.06%)  | 0.907 <sup>b</sup> | 58 (16.71%)  | 0 (0.00%) | NA <sup>b</sup> |  |
| Undefined      |       |                    |                    |              |              |                    |              | 0         |                 |  |
| Total          |       |                    |                    |              |              |                    |              | 347       |                 |  |
| P <sup>c</sup> |       | 0.158 <sup>c</sup> | 0.441 <sup>c</sup> |              |              |                    |              |           |                 |  |
| rs5757573      | CC+CT | 7.43±1.64          | 6.38±0.77          | 46 (13.11%)  | 65 (13.21%)  |                    | 63 (18.16%)  | 0 (0.00%) |                 |  |
|                | TT    | 7.57±1.63          | 6.25±0.87          | 305 (86.89%) | 427 (86.79%) | >0.05 <sup>a</sup> | 284 (81.84%) | 0 (0.00%) | NA <sup>a</sup> |  |
|                | NA    |                    |                    | 0 (0.00%)    | 0 (0.00%)    | >0.05 <sup>b</sup> | 0 (0.00%)    | 0 (0.00%) | NA <sup>b</sup> |  |
| Undefined      |       |                    |                    |              |              |                    |              | 0         |                 |  |
| Total          |       |                    |                    |              |              |                    |              | 347       |                 |  |
| P <sup>c</sup> |       | 0.385 <sup>c</sup> | 0.257 <sup>c</sup> |              |              |                    |              |           |                 |  |

**Supplementary Table 2. The association between 12 identified loci and aggressive prostate cancer risk on the basis of Gleason Score and clinical stage**

- a. The P value for two groups (GG+GA and AA) for clinical stage**  
**b. The P value for three groups (GG+GA, AA and NA) for clinical stage**  
**c. P value for the group of GG+GA and AA for Gleason Score**

|           |              |           | Linear model   |         |         | KWH test       |
|-----------|--------------|-----------|----------------|---------|---------|----------------|
| SNP       | Gene         | Statistic | P-value        | FDR     | beta    | P-value        |
| rs3217869 | <b>CCND2</b> | -3.4618   | <b>0.00075</b> | 0.0105  | -0.2953 | <b>0.00879</b> |
| rs3217869 | RAD51AP1     | 2.25616   | 0.02592        | 0.18143 | 0.05796 | 0.155          |
| rs3217869 | C12orf5      | 1.70871   | 0.09016        | 0.34652 | 0.05121 | 0.23           |
| rs3217869 | AKAP3        | 1.66292   | 0.09901        | 0.34652 | 0.02234 | 0.0922         |
| rs3217869 | DYRK4        | 1.04467   | 0.29833        | 0.77279 | 0.03423 | 0.111          |
| rs3217869 | PARP11       | 0.91995   | 0.35949        | 0.77279 | 0.04553 | 0.345          |
| rs3217869 | C12orf4      | 0.86043   | 0.39131        | 0.77279 | 0.02763 | 0.568          |
| rs3217869 | FGF6         | 0.66611   | 0.50665        | 0.77279 | 0.00774 | 0.27           |
| rs3217869 | FGF23        | 0.58241   | 0.56141        | 0.77279 | 0.00722 | 0.449          |
| rs3217869 | KCNA1        | -0.5155   | 0.60719        | 0.77279 | -0.0059 | 0.634          |
| rs3217869 | GALNT8       | 0.14609   | 0.8841         | 0.96695 | 0.00208 | 0.605          |
| rs3217869 | PRMT8        | -0.0511   | 0.9593         | 0.96695 | -0.0006 | 0.675          |
| rs3217869 | KCNA6        | -0.0415   | 0.96695        | 0.96695 | -0.0007 | 0.574          |
| rs3217869 | KCNA5        | -0.7298   | 0.46697        | 0.77279 | -0.0207 | 0.138          |

**Supplementary Table 3. Statistical analysis of the association between SNP rs3217869 and the genes located within 2 Mb of rs3217869. KWH test, Kruskal–Wallis H test.**
